# Supplementary material for: Studies directed towards nonyl acridine orange analogues having the potential to act as FRET donors with the PDT drug Pc 4
Source: Royal Society of Chemistry journal article supplement (doi:10.1039/c5ra28126a), 2016-01-01

## Supplementary Information

### Studies Directed Towards Nonylacridine Orange Analogues Having the Potential to Act as FRET Donors with the PDT Drug Pc 4

Ping Zhang,<sup>a</sup> Yang Yang,<sup>a</sup> Yun Liu,<sup>a</sup> Myriam E. Rodriguez<sup>b</sup> and Malcolm E. Kenney<sup>a\*</sup>

<sup>a</sup>*Department of Chemistry, Case Western Reserve University, Cleveland, OH 44106, USA*

<sup>b</sup>*Department of Radiation Oncology, School of Medicine, Case Western Reserve University, OH 44106, USA*

\* E-mail: [mek9@case.edu](mailto:mek9@case.edu)

Telephone: +1-216-368-3739

### The optimized geometry of 1

|   |             |             |             |
|---|-------------|-------------|-------------|
| C | -5.10702500 | -2.26663500 | 0.21506600  |
| C | -3.72669500 | -2.21423700 | 0.37327400  |
| C | -3.00058800 | -0.99970200 | 0.24124300  |
| C | -3.71878900 | 0.21833100  | -0.05328900 |
| C | -5.13407800 | 0.14535100  | -0.19840000 |
| C | -5.80615800 | -1.03810100 | -0.06941400 |
| C | -2.98428300 | 1.39971200  | -0.17432500 |
| C | -1.59859300 | 1.38048500  | -0.01098400 |
| C | -0.97167200 | 0.11443900  | 0.28859400  |
| C | 0.44508700  | 0.06958600  | 0.44682200  |
| H | 0.86914700  | -0.90705300 | 0.64308800  |
| C | 1.22993600  | 1.20442800  | 0.33751200  |
| C | 0.58299200  | 2.46093400  | 0.05486500  |
| C | -0.76973000 | 2.53751000  | -0.11461500 |
| H | -3.13978700 | -3.09275400 | 0.60698000  |
| H | -5.68555500 | 1.05807600  | -0.41423600 |
| H | -6.88310600 | -1.04437900 | -0.18540700 |
| H | -3.49363900 | 2.33665000  | -0.39651700 |
| H | 1.17424400  | 3.36920200  | 0.01519000  |
| H | -1.23760100 | 3.49867300  | -0.31730000 |
| N | -1.66277800 | -1.03316800 | 0.40720600  |
| N | -5.81470700 | -3.45775600 | 0.31053600  |
| N | 2.61647700  | 1.18910500  | 0.55789200  |
| C | 3.48036000  | 1.93255700  | -0.35384000 |
| H | 3.05513300  | 2.90679300  | -0.59562800 |
| H | 4.45091300  | 2.09990100  | 0.12522100  |
| H | 3.65230600  | 1.39237700  | -1.30112000 |
| C | 3.21342600  | -0.05764900 | 1.00578900  |
| H | 2.66792600  | -0.44352900 | 1.87112700  |
| H | 3.22703600  | -0.83982900 | 0.22642400  |
| H | 4.24660500  | 0.13734400  | 1.30977300  |
| C | -5.10771300 | -4.65562700 | 0.73037900  |
| H | -5.79000200 | -5.50734800 | 0.69284700  |
| H | -4.27176200 | -4.86552500 | 0.05361600  |
| H | -4.70346400 | -4.57639600 | 1.75250900  |
| C | -7.26302000 | -3.43925900 | 0.44664800  |
| H | -7.74085200 | -2.98469700 | -0.42889700 |
| H | -7.62372800 | -4.46749900 | 0.51456600  |
| H | -7.60437600 | -2.89766500 | 1.34304700  |

The optimized geometry of 2

|   |             |             |             |
|---|-------------|-------------|-------------|
| C | -5.15829400 | -2.27898300 | 0.28510000  |
| C | -3.76301100 | -2.22106100 | 0.42570500  |
| C | -3.06942200 | -1.01854400 | 0.22809200  |
| C | -3.73672300 | 0.18566000  | -0.11233000 |
| C | -5.14136700 | 0.10008800  | -0.24022300 |
| C | -5.83790800 | -1.07176000 | -0.05160400 |
| C | -3.00038300 | 1.42926000  | -0.31046000 |
| C | -1.55464800 | 1.34505400  | -0.13585800 |
| C | -0.92431300 | 0.12111400  | 0.20489700  |
| C | 0.46421300  | 0.02316100  | 0.37362900  |
| H | 0.88404700  | -0.94353500 | 0.62949600  |
| C | 1.28953600  | 1.14748400  | 0.21544600  |
| C | 0.66488600  | 2.38112600  | -0.13200900 |
| C | -0.69936400 | 2.45858700  | -0.29539700 |
| H | -3.19312900 | -3.10496600 | 0.69025000  |
| H | -5.66970300 | 1.01231700  | -0.49624100 |
| H | -6.91524200 | -1.06391600 | -0.16033100 |
| H | 1.26111800  | 3.27398000  | -0.27318500 |
| H | -1.16329700 | 3.40288900  | -0.55983600 |
| N | -1.69905100 | -1.00614300 | 0.37280600  |
| N | -5.85160900 | -3.45936100 | 0.46220500  |
| N | 2.65557400  | 1.06780700  | 0.39133700  |
| H | -1.23658600 | -1.87179500 | 0.61428100  |
| S | -3.77255300 | 2.87395300  | -0.71567800 |
| C | 3.49675400  | 2.22714400  | 0.13791200  |
| H | 3.22066100  | 3.07107100  | 0.78244400  |
| H | 4.53435800  | 1.96820500  | 0.35528100  |
| H | 3.44061500  | 2.56373400  | -0.90743600 |
| C | 3.27481500  | -0.21711200 | 0.66060800  |
| H | 2.89013900  | -0.65953300 | 1.58960600  |
| H | 3.10620500  | -0.93799100 | -0.15378900 |
| H | 4.35136100  | -0.08224200 | 0.77659700  |
| C | -5.14814800 | -4.64768100 | 0.91008600  |
| H | -5.85159700 | -5.47905700 | 0.97874000  |
| H | -4.36047500 | -4.93445200 | 0.20079000  |
| H | -4.68201700 | -4.51004700 | 1.89794900  |
| C | -7.30615600 | -3.46499400 | 0.43257700  |
| H | -7.74452500 | -2.84270200 | 1.22652200  |
| H | -7.68705000 | -3.10572800 | -0.53118400 |
| H | -7.66042800 | -4.48830500 | 0.56799100  |

The optimized geometry of 3

|   |             |             |             |
|---|-------------|-------------|-------------|
| C | -5.08565400 | -2.22087100 | 0.20696800  |
| C | -3.70387200 | -2.15776600 | 0.33053900  |
| C | -2.99265900 | -0.93017000 | 0.24006600  |
| C | -3.71885800 | 0.30024700  | 0.01599100  |
| C | -5.13924400 | 0.21236100  | -0.07635700 |
| C | -5.79645100 | -0.98338900 | 0.01565600  |
| C | -2.97977600 | 1.49606300  | -0.09147300 |
| C | -1.58048300 | 1.45795300  | 0.06029200  |
| C | -0.96213100 | 0.17291400  | 0.30870700  |
| C | 0.45452300  | 0.09600600  | 0.45544700  |
| H | 0.85504000  | -0.89721600 | 0.61334800  |
| C | 1.26317400  | 1.21538200  | 0.38197700  |
| C | 0.63174200  | 2.48720300  | 0.14399100  |
| C | -0.72027900 | 2.59698100  | -0.01260700 |
| H | -3.09870300 | -3.03665500 | 0.50978600  |
| H | -5.70849200 | 1.12778600  | -0.20046600 |
| H | -6.87779500 | -0.98670700 | -0.05031400 |
| H | 1.23391600  | 3.38897100  | 0.12631400  |
| H | -1.16699400 | 3.57160900  | -0.17634400 |
| N | -1.65489200 | -0.97444000 | 0.38288100  |
| N | -5.77951700 | -3.42208400 | 0.25678700  |
| N | 2.64789000  | 1.16435300  | 0.59446000  |
| S | -3.81915000 | 3.06444900  | -0.39625000 |
| C | -4.12353700 | 2.92533300  | -2.20251900 |
| H | -4.64659300 | 3.83820900  | -2.50099100 |
| H | -3.18092600 | 2.85446700  | -2.75061600 |
| H | -4.75040200 | 2.05940500  | -2.42892100 |
| C | 3.52634000  | 1.94876800  | -0.26706300 |
| H | 3.11925500  | 2.94378600  | -0.44691700 |
| H | 4.49801100  | 2.06885500  | 0.22350700  |
| H | 3.69206500  | 1.46673700  | -1.24614200 |
| C | 3.22473400  | -0.11251800 | 0.97933600  |
| H | 2.67813800  | -0.52869300 | 1.82986300  |
| H | 3.21845000  | -0.85714900 | 0.16410800  |
| H | 4.26309200  | 0.04904900  | 1.28473200  |
| C | -5.05006100 | -4.63261900 | 0.59425000  |
| H | -5.72230200 | -5.48985500 | 0.51894500  |
| H | -4.22461100 | -4.79090200 | -0.10867000 |
| H | -4.62807800 | -4.60756200 | 1.61198300  |
| C | -7.22292100 | -3.42550700 | 0.44096300  |
| H | -7.53831300 | -2.95068600 | 1.38350600  |
| H | -7.73099200 | -2.91520800 | -0.38510500 |
| H | -7.57433300 | -4.45921400 | 0.44785500  |

The optimized geometry of 4

|   |             |             |             |
|---|-------------|-------------|-------------|
| C | -5.11750300 | -2.24454000 | 0.19074400  |
| C | -3.73552500 | -2.18833700 | 0.33258400  |
| C | -3.01206000 | -0.97221700 | 0.20015000  |
| C | -3.73988600 | 0.24039800  | -0.08797700 |
| C | -5.15679700 | 0.17106100  | -0.20548300 |
| C | -5.82316200 | -1.01554300 | -0.07062400 |
| C | -3.00399800 | 1.42600200  | -0.22250600 |
| C | -1.61519100 | 1.41449000  | -0.04011300 |
| C | -0.99018500 | 0.14694500  | 0.25205900  |
| C | 0.42636900  | 0.10850100  | 0.41524500  |
| H | 0.85285700  | -0.86900400 | 0.60139500  |
| C | 1.20690900  | 1.24827300  | 0.32953500  |
| C | 0.55461900  | 2.50642200  | 0.07105700  |
| C | -0.79726400 | 2.58067800  | -0.10905300 |
| H | -3.14335200 | -3.06525200 | 0.55862000  |
| H | -5.70995600 | 1.08816600  | -0.38211800 |
| H | -6.90296800 | -1.02037800 | -0.15619400 |
| H | 1.13925200  | 3.41992900  | 0.06652300  |
| H | -1.27540200 | 3.54163900  | -0.27122800 |
| N | -1.67319400 | -1.00667400 | 0.35585500  |
| N | -5.81957500 | -3.43912800 | 0.28693500  |
| N | 2.59208700  | 1.23492600  | 0.55714300  |
| C | -3.77245200 | 2.90500000  | -1.89601500 |
| H | -4.30022300 | 3.85907400  | -1.96367800 |
| H | -2.78588500 | 2.99704100  | -2.36713100 |
| H | -4.34783900 | 2.12937300  | -2.41675800 |
| O | -3.65341300 | 2.61015100  | -0.50114500 |
| C | 3.45708600  | 2.00231200  | -0.33310700 |
| H | 3.02454200  | 2.97658400  | -0.56127200 |
| H | 4.42196000  | 2.17001200  | 0.15726400  |
| H | 3.64251100  | 1.48080700  | -1.28838000 |
| C | 3.19347800  | -0.01684500 | 0.98428300  |
| H | 2.64653400  | -0.42169500 | 1.83998500  |
| H | 3.21445300  | -0.78421000 | 0.19046000  |
| H | 4.22433200  | 0.17766500  | 1.29638100  |
| C | -5.10404400 | -4.63579100 | 0.69593900  |
| H | -5.78277400 | -5.49043000 | 0.65883900  |
| H | -4.27221800 | -4.83832800 | 0.01201600  |
| H | -4.69278900 | -4.56003300 | 1.71554400  |
| C | -7.26576700 | -3.42586000 | 0.44516700  |
| H | -7.59512300 | -2.89946500 | 1.35507600  |
| H | -7.75664100 | -2.95811600 | -0.41589700 |
| H | -7.62345500 | -4.45592400 | 0.50138500  |

The optimized geometry of 5

|    |             |             |             |
|----|-------------|-------------|-------------|
| C  | -5.10864900 | -2.26475300 | 0.22838400  |
| C  | -3.72933300 | -2.19339300 | 0.38048000  |
| C  | -3.01507700 | -0.97300100 | 0.24349900  |
| C  | -3.74657100 | 0.24063600  | -0.05264800 |
| C  | -5.16137300 | 0.14841900  | -0.19128600 |
| C  | -5.81695400 | -1.04329400 | -0.05606800 |
| C  | -2.99469500 | 1.41584500  | -0.17506100 |
| C  | -1.60436900 | 1.41306700  | -0.01600600 |
| C  | -0.98841100 | 0.13843600  | 0.28492700  |
| C  | 0.42726500  | 0.07892300  | 0.44219500  |
| H  | 0.83355000  | -0.90495000 | 0.63807900  |
| C  | 1.22972600  | 1.20092800  | 0.33307000  |
| C  | 0.59308100  | 2.46111400  | 0.04987900  |
| C  | -0.75828900 | 2.55742100  | -0.11894500 |
| H  | -3.12826700 | -3.06227800 | 0.61343700  |
| H  | -5.72772400 | 1.04786000  | -0.40658900 |
| H  | -6.89426900 | -1.05729100 | -0.16767600 |
| H  | 1.18939900  | 3.36545400  | 0.00577100  |
| H  | -1.20607700 | 3.52436600  | -0.32055700 |
| N  | -1.67957500 | -1.00576000 | 0.40615800  |
| N  | -5.80127700 | -3.46048000 | 0.33168300  |
| N  | 2.61259000  | 1.16418200  | 0.55248200  |
| Cl | -3.81927600 | 2.93343000  | -0.53962700 |
| C  | 3.49239700  | 1.93573500  | -0.31967500 |
| H  | 3.08251900  | 2.92524100  | -0.52192100 |
| H  | 4.46017000  | 2.07010000  | 0.17457200  |
| H  | 3.66607300  | 1.43480500  | -1.28752400 |
| C  | 3.19645700  | -0.09760300 | 0.97565200  |
| H  | 2.65029000  | -0.49267300 | 1.83645500  |
| H  | 3.19686900  | -0.86485600 | 0.18193900  |
| H  | 4.23270600  | 0.07946500  | 1.27905400  |
| C  | -5.07980500 | -4.65268600 | 0.74341800  |
| H  | -5.75555700 | -5.50969100 | 0.71560900  |
| H  | -4.24958400 | -4.85703700 | 0.05754100  |
| H  | -4.66529300 | -4.56759400 | 1.76052900  |
| C  | -7.25254000 | -3.46304300 | 0.43576000  |
| H  | -7.61999600 | -2.91779200 | 1.31901700  |
| H  | -7.71800800 | -3.02426800 | -0.45452000 |
| H  | -7.59883700 | -4.49578700 | 0.50734500  |

The optimized geometry of 6

|   |             |             |             |
|---|-------------|-------------|-------------|
| C | -5.09745200 | -2.24561600 | 0.21234500  |
| C | -3.71524500 | -2.18379100 | 0.33745200  |
| C | -2.99300700 | -0.96325700 | 0.23199500  |
| C | -3.71817500 | 0.25708500  | -0.01498200 |
| C | -5.13564100 | 0.17618500  | -0.11174600 |
| C | -5.80582900 | -1.01308200 | -0.00063700 |
| C | -2.98224900 | 1.46022100  | -0.14441900 |
| C | -1.58114200 | 1.41581100  | 0.04876800  |
| C | -0.96936900 | 0.13562200  | 0.29762100  |
| C | 0.44878600  | 0.07128100  | 0.44654100  |
| H | 0.85657400  | -0.92031800 | 0.59718200  |
| C | 1.25136300  | 1.19622300  | 0.39331000  |
| C | 0.61825500  | 2.46927000  | 0.18516000  |
| C | -0.73574800 | 2.56381200  | 0.01684800  |
| H | -3.11467800 | -3.06285600 | 0.53094700  |
| H | -5.72623200 | 1.08016500  | -0.23983800 |
| H | -6.88678600 | -1.01060000 | -0.06797000 |
| H | 1.21279100  | 3.37595700  | 0.21161900  |
| H | -1.16850300 | 3.55548900  | -0.09182900 |
| N | -1.65367300 | -1.01899700 | 0.37320700  |
| N | -5.79365500 | -3.44805200 | 0.27932900  |
| N | 2.64001400  | 1.15134200  | 0.60660200  |
| N | -3.62484300 | 2.66030700  | -0.40813600 |
| H | -3.05112800 | 3.37811000  | -0.82888800 |
| H | -4.51977700 | 2.58318000  | -0.87123600 |
| C | 3.50357100  | 1.91825600  | -0.28536400 |
| H | 3.08847900  | 2.90726900  | -0.48131500 |
| H | 4.48271000  | 2.05255800  | 0.18690200  |
| H | 3.65593100  | 1.41537900  | -1.25660100 |
| C | 3.21979100  | -0.12538900 | 0.98698900  |
| H | 2.67499100  | -0.54490600 | 1.83697500  |
| H | 3.21479000  | -0.86868000 | 0.17009700  |
| H | 4.25848500  | 0.03773500  | 1.29146300  |
| C | -5.06704600 | -4.64907400 | 0.65474500  |
| H | -5.73838700 | -5.50837400 | 0.59261000  |
| H | -4.23470900 | -4.82393900 | -0.03561900 |
| H | -4.65505500 | -4.60013200 | 1.67601400  |
| C | -7.23313600 | -3.44118800 | 0.48822400  |
| H | -7.75125600 | -2.93361900 | -0.33318400 |
| H | -7.59136400 | -4.47263300 | 0.50748400  |
| H | -7.53139300 | -2.95745500 | 1.43244300  |

The optimized geometry of 7

|   |             |             |             |
|---|-------------|-------------|-------------|
| C | -5.04232500 | -2.25781400 | 0.23250000  |
| C | -3.66062100 | -2.21278000 | 0.37005800  |
| C | -2.93346400 | -0.99543700 | 0.26956500  |
| C | -3.64693800 | 0.23661700  | 0.03131900  |
| C | -5.06540600 | 0.16939800  | -0.09560100 |
| C | -5.73781500 | -1.01684300 | 0.00208000  |
| C | -2.91732300 | 1.43739200  | -0.06116000 |
| C | -1.51637800 | 1.38591000  | 0.08461100  |
| C | -0.90101700 | 0.09945200  | 0.32439600  |
| C | 0.51756400  | 0.01976500  | 0.45956100  |
| H | 0.91819800  | -0.97475700 | 0.61006100  |
| C | 1.32789200  | 1.13734000  | 0.38687000  |
| C | 0.69946700  | 2.41288100  | 0.16860700  |
| C | -0.65432400 | 2.52456500  | 0.02187600  |
| H | -3.07004100 | -3.09868700 | 0.56307000  |
| H | -5.60333400 | 1.09435900  | -0.27262200 |
| H | -6.81653500 | -1.01445200 | -0.09939400 |
| H | 1.30484400  | 3.31288100  | 0.15938200  |
| H | -1.08473600 | 3.50745900  | -0.12872100 |
| N | -1.59532300 | -1.04746200 | 0.41174400  |
| N | -5.75236000 | -3.44997700 | 0.29639300  |
| N | 2.71731200  | 1.08442600  | 0.58506700  |
| N | -3.65209600 | 2.64839900  | -0.29927400 |
| C | -3.75713900 | 3.57407000  | 0.82068900  |
| H | -2.85011200 | 4.17572800  | 1.00807200  |
| H | -4.58489900 | 4.26956100  | 0.63189400  |
| H | -3.98508300 | 3.01488300  | 1.73295400  |
| C | -3.47715500 | 3.27507400  | -1.60259900 |
| H | -4.31685200 | 3.95810400  | -1.78458400 |
| H | -2.54416600 | 3.85475900  | -1.71599100 |
| H | -3.49214100 | 2.50512400  | -2.37957800 |
| C | 3.58020300  | 1.84403700  | -0.31407800 |
| H | 3.17173400  | 2.83591100  | -0.50886900 |
| H | 4.56323700  | 1.97170200  | 0.15165700  |
| H | 3.72211500  | 1.33828400  | -1.28515900 |
| C | 3.29239900  | -0.19358000 | 0.96863500  |
| H | 2.75320800  | -0.60355200 | 1.82685900  |
| H | 3.27401900  | -0.94208300 | 0.15686200  |
| H | 4.33507600  | -0.03549700 | 1.26157700  |
| C | -5.04243200 | -4.66318400 | 0.66368300  |
| H | -5.72585100 | -5.51263300 | 0.60061500  |
| H | -4.21389500 | -4.84726100 | -0.02931100 |
| H | -4.62726500 | -4.62354000 | 1.68389800  |



|   |             |             |             |
|---|-------------|-------------|-------------|
| C | -7.19700600 | -3.43108300 | 0.46786000  |
| H | -7.51440500 | -2.92597100 | 1.39394000  |
| H | -7.69267600 | -2.93805800 | -0.37614200 |
| H | -7.56125300 | -4.45989600 | 0.50104900  |

The optimized geometry of 8

|   |             |             |             |
|---|-------------|-------------|-------------|
| C | -5.09356200 | -2.32785600 | 0.05244000  |
| C | -3.71848100 | -2.24714500 | 0.23570800  |
| C | -3.02536300 | -1.00656300 | 0.20528600  |
| C | -3.76839000 | 0.20984000  | -0.00875500 |
| C | -5.17630000 | 0.10849800  | -0.17951200 |
| C | -5.81771800 | -1.09979300 | -0.14926000 |
| C | -3.05884200 | 1.43556100  | -0.03328000 |
| C | -1.65611000 | 1.41096700  | 0.15489100  |
| C | -1.01974400 | 0.13575700  | 0.36847300  |
| C | 0.39470600  | 0.09025700  | 0.54734000  |
| H | 0.82067200  | -0.89657900 | 0.67639300  |
| C | 1.17263200  | 1.23427200  | 0.53834000  |
| C | 0.51462300  | 2.49884600  | 0.33983300  |
| C | -0.83707500 | 2.57612000  | 0.15338200  |
| H | -3.10694400 | -3.12195100 | 0.41320600  |
| H | -5.74822100 | 1.01834400  | -0.33485100 |
| H | -6.89260700 | -1.12182400 | -0.28214000 |
| H | 1.09345400  | 3.41524600  | 0.37659800  |
| H | -1.31058400 | 3.54347600  | 0.01544300  |
| N | -1.69021400 | -1.02945100 | 0.38999500  |
| N | -5.76795400 | -3.54138100 | 0.04595500  |
| N | 2.55465000  | 1.21274900  | 0.78137400  |
| C | -3.74125400 | 2.66459400  | -0.24397400 |
| C | -4.32527400 | 3.71802500  | -0.42506100 |
| C | -5.00830700 | 4.94963300  | -0.63704200 |
| C | -6.40375200 | 4.97111400  | -0.83810300 |
| C | -4.30154700 | 6.16963300  | -0.64970600 |
| C | -7.06720500 | 6.17697800  | -1.04481900 |
| H | -6.95358400 | 4.03498700  | -0.82974800 |
| C | -4.97349500 | 7.37068100  | -0.85715100 |
| H | -3.22695700 | 6.15986000  | -0.49530900 |
| C | -6.35663000 | 7.38000400  | -1.05526400 |
| H | -8.14293600 | 6.17865600  | -1.19847200 |
| H | -4.41621100 | 8.30352400  | -0.86428900 |
| H | -6.87777500 | 8.31958600  | -1.21682900 |
| C | 3.15590300  | -0.06123700 | 1.13735700  |
| H | 2.60179300  | -0.51919900 | 1.96116000  |
| H | 3.18757500  | -0.77849200 | 0.29839800  |
| H | 4.18274800  | 0.11657400  | 1.47164400  |
| C | 3.42732800  | 2.03838200  | -0.04726600 |
| H | 2.99719600  | 3.02628800  | -0.21247100 |
| H | 4.38727900  | 2.17218100  | 0.46262100  |
| H | 3.62182400  | 1.58300200  | -1.03386700 |

|   |             |             |             |
|---|-------------|-------------|-------------|
| C | -5.03257000 | -4.74780400 | 0.38459300  |
| H | -5.68820400 | -5.61309300 | 0.26709900  |
| H | -4.17954200 | -4.87939300 | -0.29048000 |
| H | -4.64833100 | -4.73802200 | 1.41743600  |
| C | -7.21795500 | -3.57280100 | 0.16149000  |
| H | -7.58590500 | -3.11520000 | 1.09345500  |
| H | -7.69673900 | -3.06161600 | -0.68159900 |
| H | -7.55027500 | -4.61257400 | 0.14037400  |

The optimized geometry of 9

|   |             |             |             |
|---|-------------|-------------|-------------|
| C | -5.11239200 | -2.26739100 | 0.24949300  |
| C | -3.73050200 | -2.20518600 | 0.39442700  |
| C | -3.01629800 | -0.98570300 | 0.25885200  |
| C | -3.74365600 | 0.22760800  | -0.02720200 |
| C | -5.15812100 | 0.14917100  | -0.16083200 |
| C | -5.81774200 | -1.04105000 | -0.02752400 |
| C | -3.00093000 | 1.41886900  | -0.15250500 |
| C | -1.60120100 | 1.39925100  | 0.00163200  |
| C | -0.98197100 | 0.12914600  | 0.29311400  |
| C | 0.43360400  | 0.07016100  | 0.44254100  |
| H | 0.84582400  | -0.91224700 | 0.63273500  |
| C | 1.23044000  | 1.19784900  | 0.33238200  |
| C | 0.58652500  | 2.45724900  | 0.05567300  |
| C | -0.76665500 | 2.54931400  | -0.10520300 |
| H | -3.13353000 | -3.07892000 | 0.61944800  |
| H | -5.71887200 | 1.05573700  | -0.37052500 |
| H | -6.89552800 | -1.05173500 | -0.13436700 |
| H | 1.17898000  | 3.36365400  | 0.00814200  |
| H | -1.22363700 | 3.51471300  | -0.30383400 |
| N | -1.67767100 | -1.01476400 | 0.41319900  |
| N | -5.81035800 | -3.45714000 | 0.35477400  |
| N | 2.61248200  | 1.16572200  | 0.54468200  |
| C | -3.67188100 | 2.65252500  | -0.43847300 |
| N | -4.21743800 | 3.65447200  | -0.67065700 |
| C | 3.20627300  | -0.09632700 | 0.95389800  |
| H | 2.66719000  | -0.50255600 | 1.81402100  |
| H | 3.20705100  | -0.85577700 | 0.15306200  |
| H | 4.24267300  | 0.08442500  | 1.25375600  |
| C | 3.48987300  | 1.96376900  | -0.30606900 |
| H | 3.07685800  | 2.95650500  | -0.48396100 |
| H | 4.45548000  | 2.09015800  | 0.19398200  |
| H | 3.66794000  | 1.48802200  | -1.28538300 |
| C | -5.09250400 | -4.66004400 | 0.74134200  |
| H | -5.77750900 | -5.50959500 | 0.72367800  |
| H | -4.27854800 | -4.86892400 | 0.03698300  |
| H | -4.65647900 | -4.58460600 | 1.74972900  |
| C | -7.26380400 | -3.45914100 | 0.42659400  |
| H | -7.64837400 | -2.90149900 | 1.29406600  |
| H | -7.71110600 | -3.03336500 | -0.47955500 |
| H | -7.61122700 | -4.49057700 | 0.50722500  |

The optimized geometry of 10

|   |             |             |             |
|---|-------------|-------------|-------------|
| C | -5.11401400 | -2.33047800 | 0.22613000  |
| C | -3.73737600 | -2.24329200 | 0.38994800  |
| C | -3.04423100 | -1.00801300 | 0.28118000  |
| C | -3.78299700 | 0.20418800  | 0.01046700  |
| C | -5.19901900 | 0.09201300  | -0.14253400 |
| C | -5.83623600 | -1.11260300 | -0.03922600 |
| C | -3.06912800 | 1.41621400  | -0.05209100 |
| C | -1.66733500 | 1.39905100  | 0.09172100  |
| C | -1.02988000 | 0.12733800  | 0.34922000  |
| C | 0.38861000  | 0.06999500  | 0.48691700  |
| H | 0.80190900  | -0.91558500 | 0.65918600  |
| C | 1.18484100  | 1.19544100  | 0.37725000  |
| C | 0.53752700  | 2.45266700  | 0.10958400  |
| C | -0.81857500 | 2.54535600  | -0.02789300 |
| H | -3.12445100 | -3.10808700 | 0.60735200  |
| H | -5.77439600 | 0.98152700  | -0.37073300 |
| H | -6.91128500 | -1.14158200 | -0.17012300 |
| H | 1.13077200  | 3.35780300  | 0.04157600  |
| H | -1.26231400 | 3.51364000  | -0.23384000 |
| N | -1.70831500 | -1.02645300 | 0.45253600  |
| N | -5.79095500 | -3.53756900 | 0.29767900  |
| N | 2.57292200  | 1.16392400  | 0.57418000  |
| C | -3.82975300 | 2.70305200  | -0.28141400 |
| O | -4.58111800 | 2.87728800  | -1.23209100 |
| N | -3.63356100 | 3.66546700  | 0.67279400  |
| H | -4.19333000 | 4.50549700  | 0.61578900  |
| H | -3.12466800 | 3.47500800  | 1.52323500  |
| C | 3.43135700  | 1.93216300  | -0.32228100 |
| H | 3.02093100  | 2.92422700  | -0.51116400 |
| H | 4.41343700  | 2.06094200  | 0.14454100  |
| H | 3.57488200  | 1.43207000  | -1.29554400 |
| C | 3.16601900  | -0.09983500 | 0.97855100  |
| H | 2.63418700  | -0.50238900 | 1.84488800  |
| H | 3.15531300  | -0.86163800 | 0.17956400  |
| H | 4.20677900  | 0.07703600  | 1.26664100  |
| C | -5.05557400 | -4.72995600 | 0.68200700  |
| H | -5.71842000 | -5.59567400 | 0.62560900  |
| H | -4.21729600 | -4.90314000 | -0.00268100 |
| H | -4.64941100 | -4.66727600 | 1.70425800  |
| C | -7.24284000 | -3.56367400 | 0.38636000  |
| H | -7.62746100 | -3.04229900 | 1.27675200  |
| H | -7.70607000 | -3.11311800 | -0.49917000 |
| H | -7.57431600 | -4.60274200 | 0.43323500  |

The optimized geometry of **18**

|   |             |             |             |
|---|-------------|-------------|-------------|
| C | -5.11006800 | -2.29079200 | 0.18308200  |
| C | -3.72702000 | -2.23343400 | 0.30845300  |
| C | -3.02156900 | -0.99965700 | 0.28613300  |
| C | -3.75999400 | 0.23167200  | 0.14393600  |
| C | -5.17758200 | 0.15187200  | 0.03141800  |
| C | -5.83051900 | -1.04982000 | 0.05158700  |
| C | -3.04418400 | 1.43233100  | 0.12908800  |
| C | -1.65406700 | 1.41899300  | 0.25021500  |
| C | -1.01083200 | 0.13765500  | 0.39384200  |
| C | 0.41259800  | 0.10619900  | 0.49904100  |
| H | 0.86227600  | -0.87603200 | 0.57654700  |
| C | 1.18946000  | 1.24494700  | 0.48591400  |
| C | 0.51443300  | 2.53112100  | 0.37862100  |
| C | -0.84886300 | 2.59837800  | 0.24971300  |
| H | -3.12198700 | -3.12215400 | 0.43167300  |
| H | -5.74745500 | 1.07310700  | -0.07049900 |
| H | -6.91022600 | -1.05974000 | -0.03586700 |
| H | -3.57421700 | 2.37796700  | 0.02241400  |
| H | -1.35055500 | 3.55673900  | 0.17161100  |
| N | -1.67834600 | -1.02715900 | 0.41021300  |
| N | -5.80090200 | -3.49795500 | 0.16603500  |
| N | 2.58548800  | 1.21382500  | 0.66090900  |
| C | 3.41364600  | 1.80604900  | -0.39155800 |
| H | 2.99833800  | 2.76050700  | -0.70811900 |
| H | 4.42110200  | 1.98053100  | 0.00244700  |
| H | 3.49752000  | 1.14101400  | -1.26895100 |
| C | 3.15557500  | -0.02443800 | 1.16622700  |
| H | 2.59849400  | -0.36179200 | 2.04438100  |
| H | 3.16496400  | -0.84226300 | 0.42333000  |
| H | 4.19182400  | 0.16815100  | 1.46401200  |
| C | -5.06506200 | -4.72052500 | 0.43885800  |
| H | -5.73360400 | -5.57591800 | 0.32043500  |
| H | -4.24125400 | -4.83848200 | -0.27374600 |
| H | -4.63934400 | -4.74735700 | 1.45538700  |
| C | -7.24004900 | -3.51529300 | 0.37922400  |
| H | -7.76719200 | -2.96918500 | -0.41140300 |
| H | -7.58855300 | -4.54950500 | 0.34450900  |
| H | -7.53817300 | -3.08623200 | 1.34927800  |
| O | 1.33034200  | 3.62558100  | 0.45013700  |
| C | 0.73129400  | 4.91015100  | 0.42431900  |
| H | 1.55085700  | 5.62438600  | 0.52348200  |
| H | 0.20228400  | 5.09071200  | -0.52102800 |
| H | 0.02967800  | 5.03961300  | 1.25870900  |

The optimized geometry of **20**

|   |             |             |             |
|---|-------------|-------------|-------------|
| C | -5.11742900 | -2.29100400 | 0.18234300  |
| C | -3.73611600 | -2.21094800 | 0.29931100  |
| C | -3.04744300 | -0.96769600 | 0.27236900  |
| C | -3.79225000 | 0.26103300  | 0.12518700  |
| C | -5.21104500 | 0.15418200  | 0.03881900  |
| C | -5.84782100 | -1.05686100 | 0.06774000  |
| C | -3.07319000 | 1.47530700  | 0.08013500  |
| C | -1.67215800 | 1.45311300  | 0.21808300  |
| C | -1.03845400 | 0.16567100  | 0.38438900  |
| C | 0.38372200  | 0.11328200  | 0.50315000  |
| H | 0.81090200  | -0.87745600 | 0.59581200  |
| C | 1.18184000  | 1.23548800  | 0.48424400  |
| C | 0.52141600  | 2.52581300  | 0.35442500  |
| C | -0.83903200 | 2.61326800  | 0.20924500  |
| H | -3.11420200 | -3.08776200 | 0.42345300  |
| H | -5.79714200 | 1.06492400  | -0.02906200 |
| H | -6.92955300 | -1.07354300 | 0.00917900  |
| H | -1.32337700 | 3.57620500  | 0.11854000  |
| N | -1.70629700 | -0.99524600 | 0.40059900  |
| N | -5.79157700 | -3.50666600 | 0.16551800  |
| N | 2.57344100  | 1.18291300  | 0.67432900  |
| C | 3.42676200  | 1.76835400  | -0.36172800 |
| H | 3.02719300  | 2.72735200  | -0.68424900 |
| H | 4.42854900  | 1.93140800  | 0.05098600  |
| H | 3.51960600  | 1.10334100  | -1.23813400 |
| C | 3.11932200  | -0.06284500 | 1.18790100  |
| H | 2.54871200  | -0.38967800 | 2.06133400  |
| H | 3.12298900  | -0.88186300 | 0.44641600  |
| H | 4.15533700  | 0.11433400  | 1.49550000  |
| C | -5.03843400 | -4.71895900 | 0.43757800  |
| H | -5.69466800 | -5.58364500 | 0.31761900  |
| H | -4.21264400 | -4.82417800 | -0.27467100 |
| H | -4.61337400 | -4.74088500 | 1.45444000  |
| C | -7.22952100 | -3.54373100 | 0.38513200  |
| H | -7.76477900 | -2.98726500 | -0.39234300 |
| H | -7.56698800 | -4.58078700 | 0.33038200  |
| H | -7.52813400 | -3.13765200 | 1.36489300  |
| O | 1.34616100  | 3.61219700  | 0.42310400  |
| C | 0.75989900  | 4.90410900  | 0.38576700  |
| H | 1.58678900  | 5.60911700  | 0.48952800  |
| H | 0.24172600  | 5.08479700  | -0.56505900 |
| H | 0.05145600  | 5.04342200  | 1.21206000  |
| S | -3.94108000 | 3.04215200  | -0.13017400 |

|   |             |            |             |
|---|-------------|------------|-------------|
| C | -4.26118300 | 2.99847800 | -1.93885800 |
| H | -4.87805200 | 2.13660800 | -2.20503300 |
| H | -4.80018700 | 3.91812900 | -2.18352800 |
| H | -3.32320800 | 2.96973200 | -2.49866800 |



The optimized geometry of 23

|   |             |             |             |
|---|-------------|-------------|-------------|
| C | -5.09806600 | -2.43364100 | 0.15725100  |
| C | -3.72215400 | -2.33398000 | 0.31153400  |
| C | -3.04355300 | -1.08488700 | 0.26656800  |
| C | -3.79818700 | 0.13210200  | 0.07366800  |
| C | -5.21179800 | 0.00308700  | -0.07015500 |
| C | -5.83695600 | -1.21390100 | -0.02943500 |
| C | -3.10005900 | 1.35881400  | 0.03998700  |
| C | -1.70116400 | 1.33989200  | 0.18968800  |
| C | -1.04983600 | 0.06973800  | 0.38026100  |
| C | 0.37178000  | 0.04858500  | 0.51230400  |
| H | 0.82217700  | -0.92999800 | 0.62347000  |
| C | 1.14392600  | 1.18958400  | 0.48294700  |
| C | 0.45981600  | 2.46544300  | 0.33021900  |
| C | -0.90053800 | 2.52182700  | 0.17500600  |
| H | -3.09469100 | -3.20045900 | 0.47480300  |
| H | -5.81445800 | 0.89173400  | -0.21650300 |
| H | -6.91384400 | -1.24660400 | -0.14418700 |
| H | -1.41968300 | 3.46428100  | 0.06270400  |
| N | -1.70415300 | -1.09992200 | 0.41815000  |
| N | -5.75976300 | -3.65817200 | 0.16068800  |
| N | 2.53641300  | 1.17005600  | 0.68291400  |
| C | 3.38081500  | 1.75081100  | -0.36279900 |
| H | 2.96347300  | 2.69549400  | -0.70477300 |
| H | 4.37852000  | 1.94137400  | 0.04835900  |
| H | 3.48857300  | 1.07078600  | -1.22605600 |
| C | 3.10514200  | -0.05479400 | 1.22086200  |
| H | 2.53547600  | -0.37910600 | 2.09588200  |
| H | 3.13143700  | -0.88644300 | 0.49380500  |
| H | 4.13520100  | 0.14946700  | 1.53215600  |
| C | -5.00183000 | -4.85018400 | 0.50043400  |
| H | -5.64429600 | -5.72680200 | 0.39204300  |
| H | -4.15351700 | -4.97092000 | -0.18202500 |
| H | -4.60776800 | -4.83030000 | 1.52996700  |
| C | -7.20044100 | -3.70164300 | 0.35924000  |
| H | -7.72891400 | -3.17806400 | -0.44522100 |
| H | -7.52765600 | -4.74323700 | 0.33503900  |
| H | -7.51880900 | -3.26469300 | 1.31959300  |
| O | 1.26518700  | 3.56950600  | 0.38942400  |
| C | 0.65280700  | 4.84629600  | 0.31982300  |
| H | 1.46298500  | 5.57179700  | 0.41581000  |
| H | 0.13860700  | 4.99638800  | -0.63870800 |
| H | -0.06637600 | 4.98836700  | 1.13680400  |
| N | -3.73612600 | 2.63458200  | -0.13969200 |

|   |             |            |             |
|---|-------------|------------|-------------|
| C | -4.56086000 | 3.11480400 | 0.96118700  |
| H | -4.70316300 | 4.19794700 | 0.85367900  |
| H | -5.56121000 | 2.65184600 | 1.02673800  |
| H | -4.04297300 | 2.93256800 | 1.90742800  |
| C | -4.26037700 | 2.91692200 | -1.46930900 |
| H | -5.21711500 | 2.41720500 | -1.70324500 |
| H | -4.41727900 | 3.99870400 | -1.56940400 |
| H | -3.52728500 | 2.60883000 | -2.22071000 |

### The optimized geometry of 34

|   |             |             |             |
|---|-------------|-------------|-------------|
| C | -5.07234200 | -2.27992400 | 0.18573500  |
| C | -3.69402700 | -2.18918600 | 0.36402600  |
| C | -3.01178100 | -0.95012000 | 0.27076400  |
| C | -3.75481100 | 0.24912000  | -0.00121500 |
| C | -5.16267300 | 0.14041900  | -0.16936200 |
| C | -5.80152700 | -1.06733100 | -0.07858500 |
| C | -3.05223800 | 1.45960000  | -0.07721600 |
| C | -1.67325900 | 1.49338400  | 0.10612300  |
| C | -1.02499900 | 0.23361200  | 0.36708300  |
| C | 0.40544800  | 0.19685800  | 0.50345800  |
| H | 0.83887000  | -0.78757400 | 0.63606700  |
| C | 1.17977100  | 1.31813100  | 0.42270000  |
| C | 0.54440600  | 2.62620000  | 0.26588400  |
| C | -0.86544900 | 2.70980600  | 0.07507300  |
| H | -3.08247800 | -3.05471900 | 0.58279400  |
| H | -5.73926500 | 1.04091300  | -0.37025900 |
| H | -6.87624300 | -1.10158200 | -0.20979900 |
| H | -3.61306200 | 2.36753900  | -0.28213700 |
| N | -1.67070500 | -0.93520800 | 0.44757900  |
| N | -5.74216200 | -3.49358900 | 0.24494900  |
| N | 2.59527000  | 1.27987800  | 0.53087800  |
| C | 3.31473300  | 1.56034700  | -0.71597400 |
| H | 2.87738700  | 2.42120100  | -1.22410100 |
| H | 4.36320900  | 1.78530900  | -0.48921700 |
| H | 3.28633500  | 0.70138900  | -1.40934400 |
| C | 3.16287100  | 0.13060100  | 1.22163100  |
| H | 2.64055000  | -0.02712700 | 2.16881000  |
| H | 3.11711000  | -0.80512000 | 0.63600100  |
| H | 4.21770600  | 0.33750900  | 1.43438000  |
| C | -5.00520100 | -4.67982300 | 0.64605800  |
| H | -5.66253700 | -5.54938100 | 0.58407200  |
| H | -4.15680100 | -4.85246500 | -0.02603700 |
| H | -4.61392500 | -4.61059600 | 1.67372200  |
| C | -7.19379600 | -3.52561800 | 0.33120200  |
| H | -7.65690800 | -3.07457000 | -0.55433800 |
| H | -7.52171600 | -4.56598300 | 0.37419400  |
| H | -7.58270400 | -3.00779400 | 1.22209200  |
| C | -1.43996900 | 3.98820000  | -0.09510200 |
| C | 1.29696600  | 3.81713000  | 0.35406900  |
| C | -0.67482200 | 5.14166500  | -0.05033300 |
| H | 2.35369100  | 3.74378000  | 0.58479400  |
| C | 0.70400800  | 5.05797500  | 0.19365200  |

|   |             |            |             |
|---|-------------|------------|-------------|
| H | -2.51008500 | 4.07941100 | -0.24981500 |
| H | 1.30304300  | 5.96144000 | 0.26942200  |
| H | -1.14966500 | 6.11025200 | -0.18252500 |

The calculated IR spectrum of **1**:

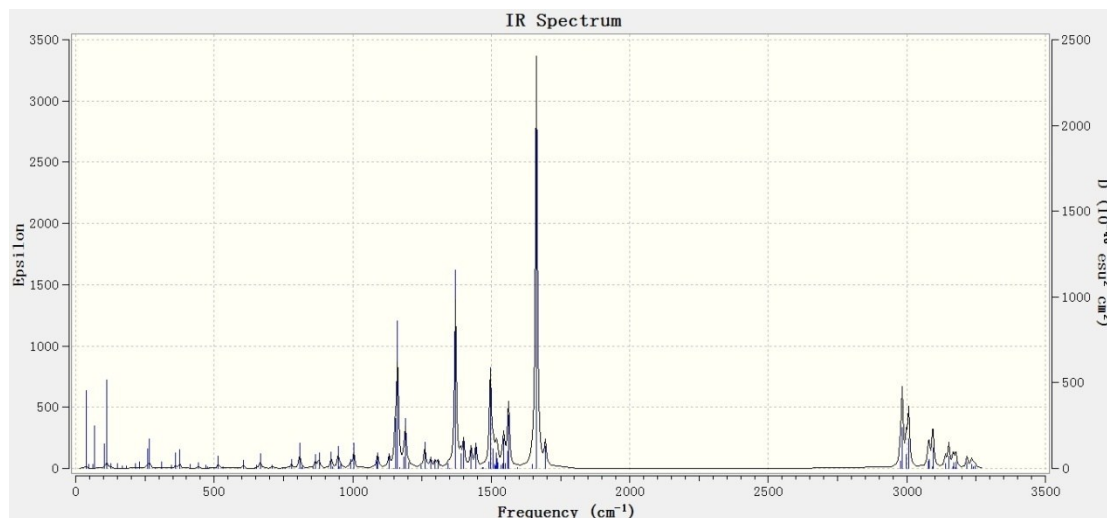

The calculated IR spectrum of **2**:

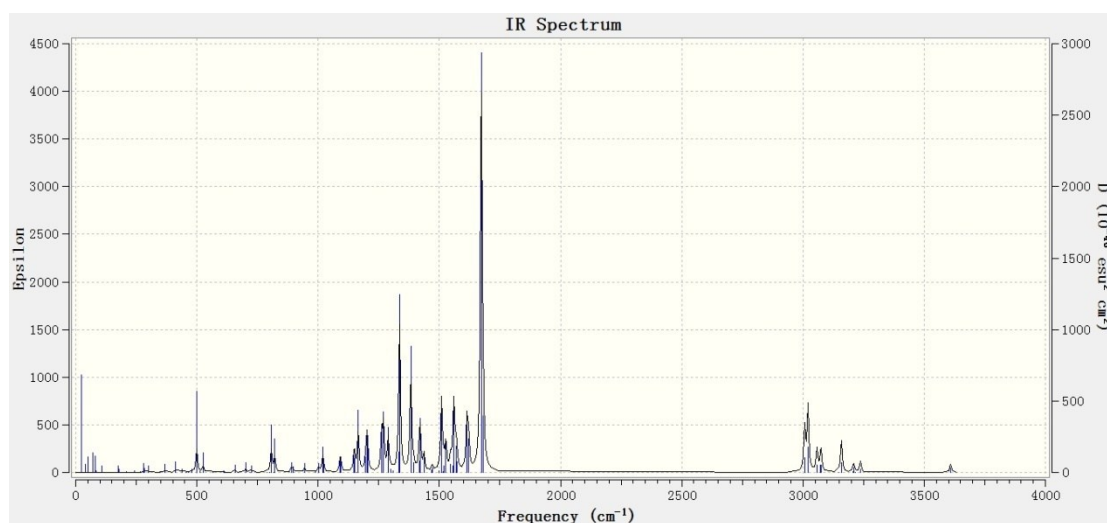

The calculated IR spectrum of **3**:

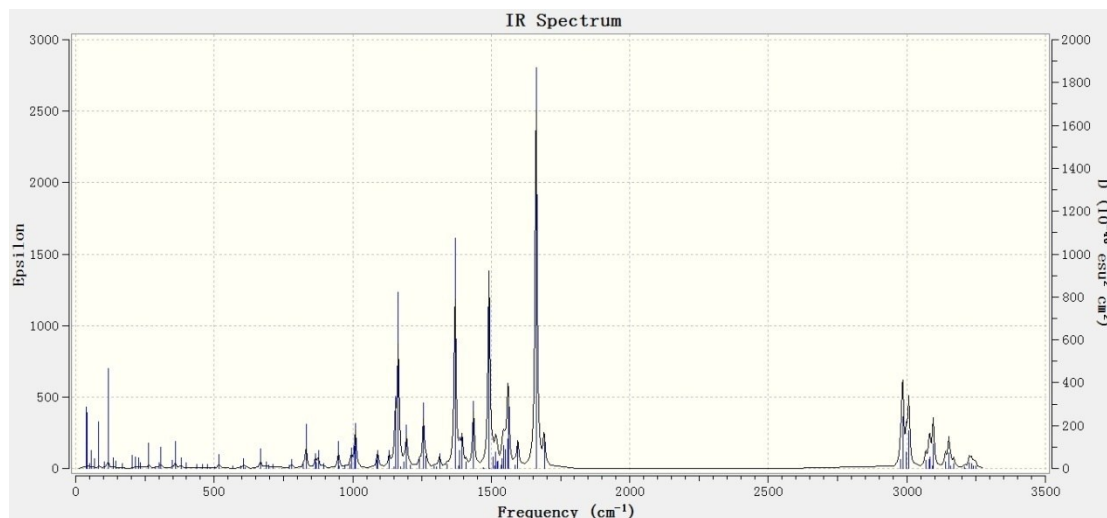

The calculated IR spectrum of **4**:

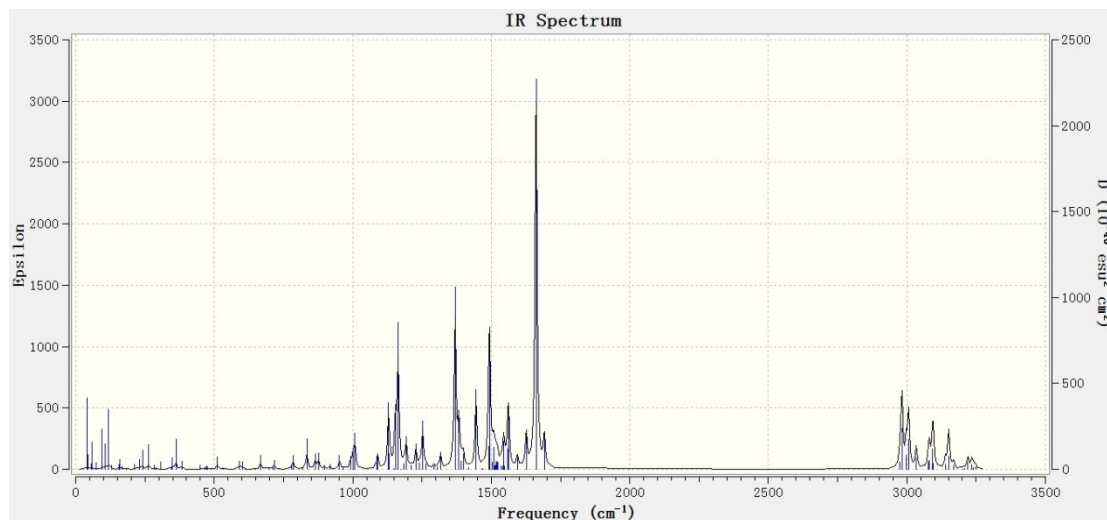

The calculated IR spectrum of **5**:

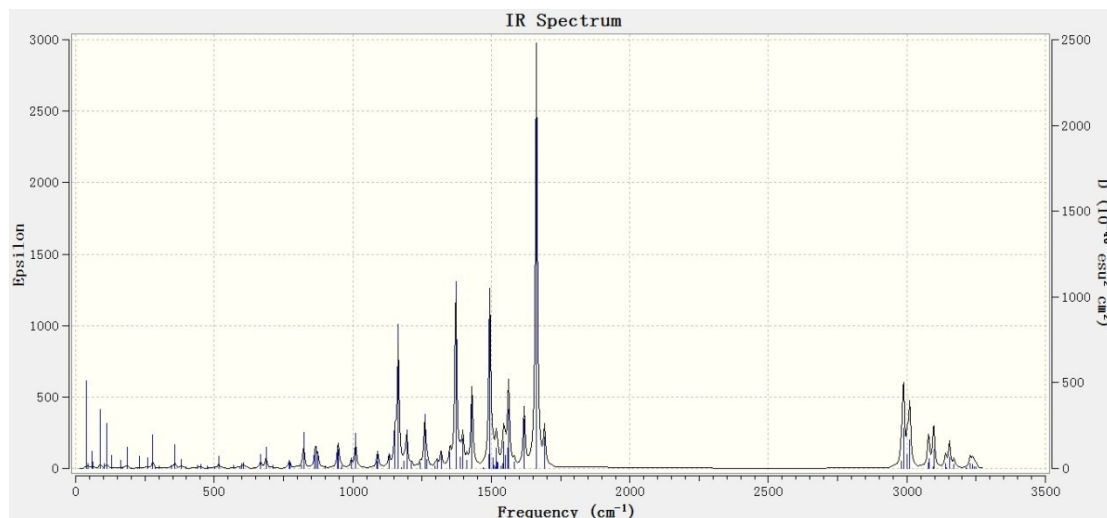

The calculated IR spectrum of **6**:

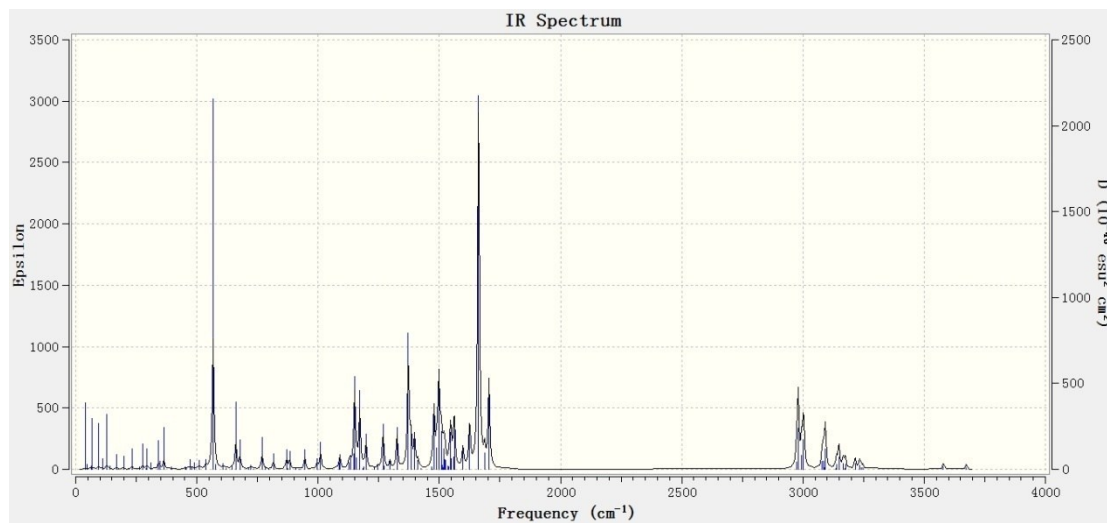

The calculated IR spectrum of **7**:

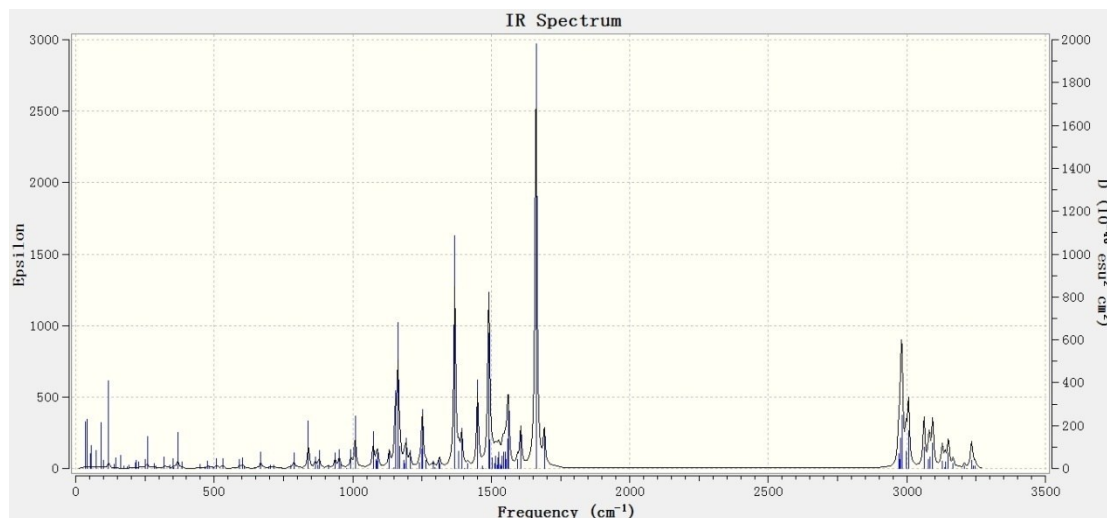

The calculated IR spectrum of **8**:

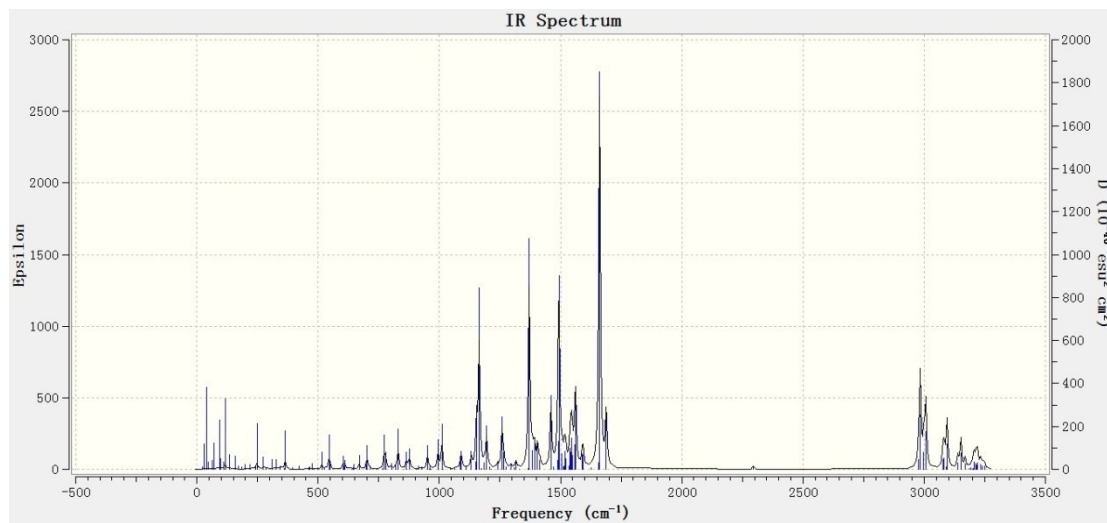



The calculated IR spectrum of **9**:

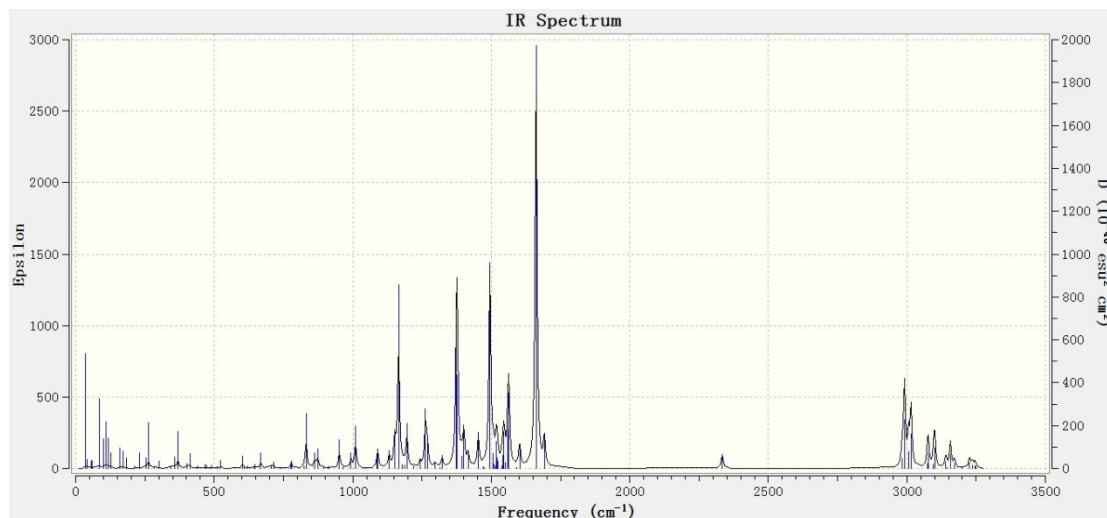

The calculated IR spectrum of **10**:

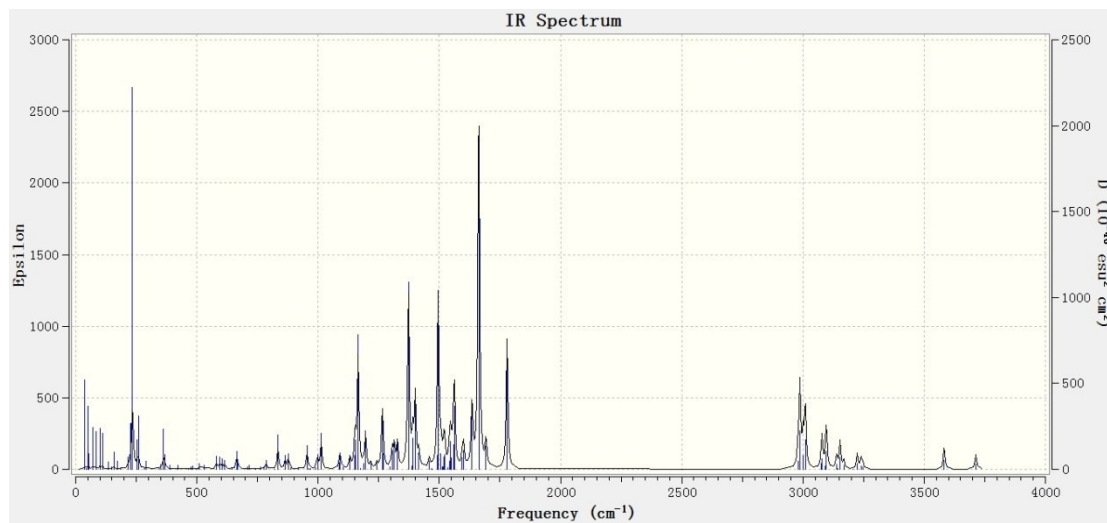

The calculated IR spectrum of **18**:

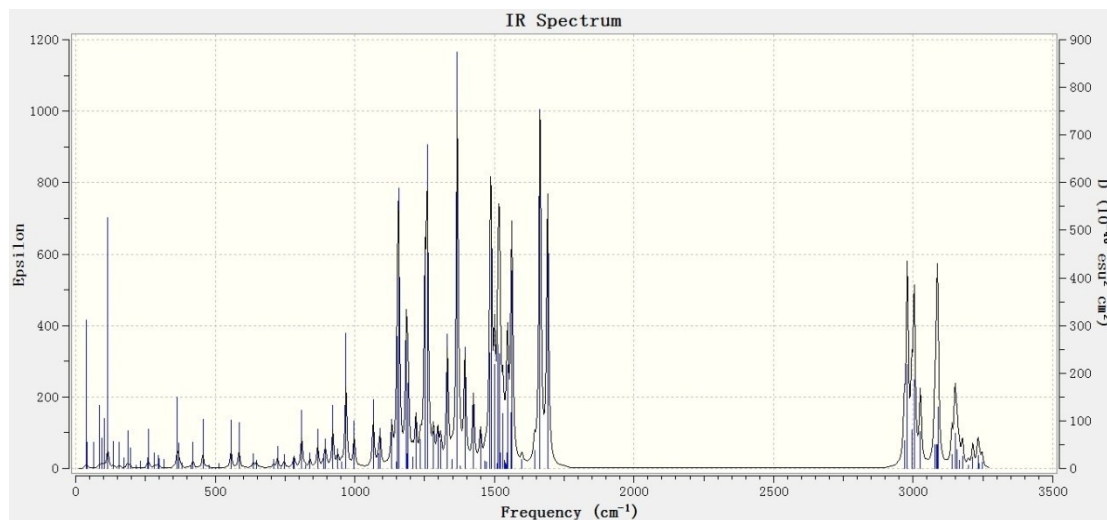

The calculated IR spectrum of **20**:

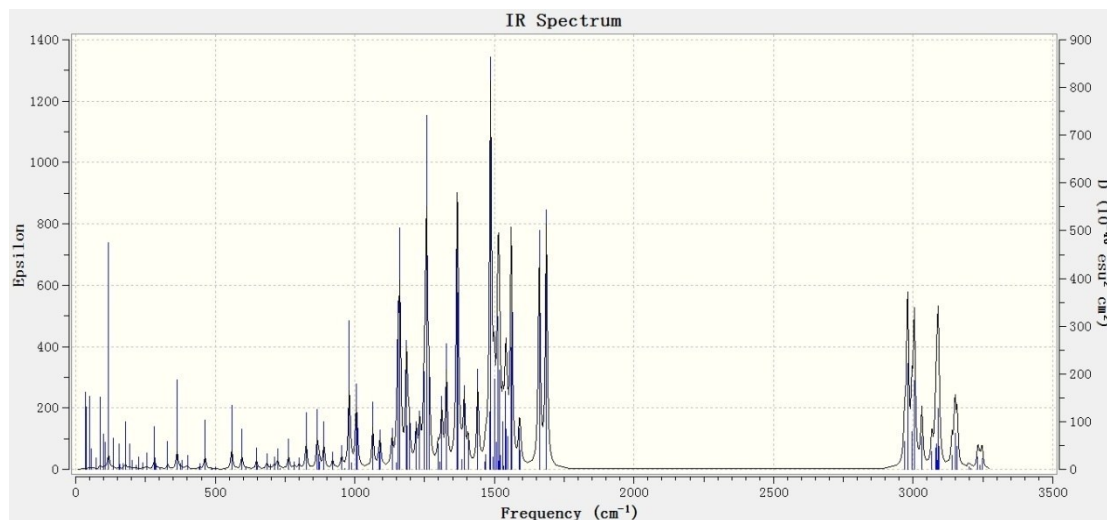

The calculated IR spectrum of **23**:

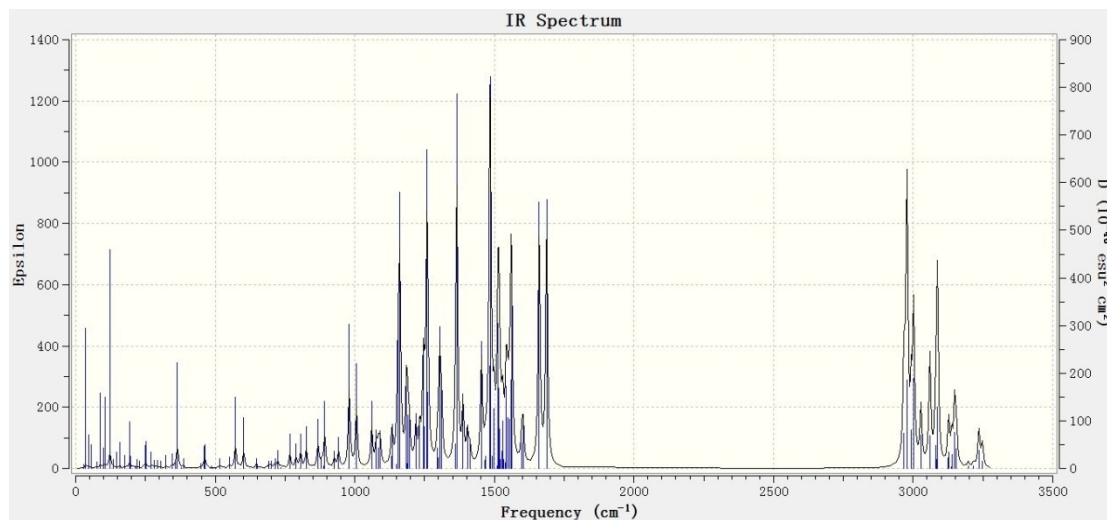

The calculated IR spectrum of **34**:

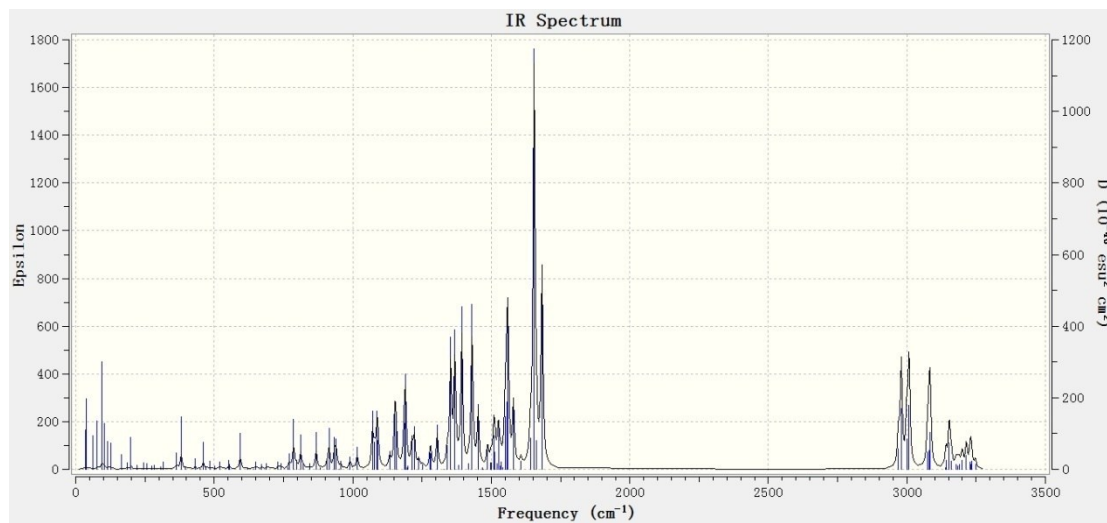

Supplement: c5ra28126a1.pdf [file c5ra28126a1.pdf]
